# Supplementary material for: ITK signaling regulates a switch between T helper 17 and T regulatory cell lineages via a calcium-mediated pathway
Source: PubMed Central journal article supplement — bioRxiv. 2023 Apr 3:2023.04.01.535229. Preprint. [Version 1] doi: 10.1101/2023.04.01.535229 (PMC10103963; doi:10.1101/2023.04.01.535229), 2023-04-03
Supplement: media-1.pdf [file media-1.pdf]

## Supplementary Materials

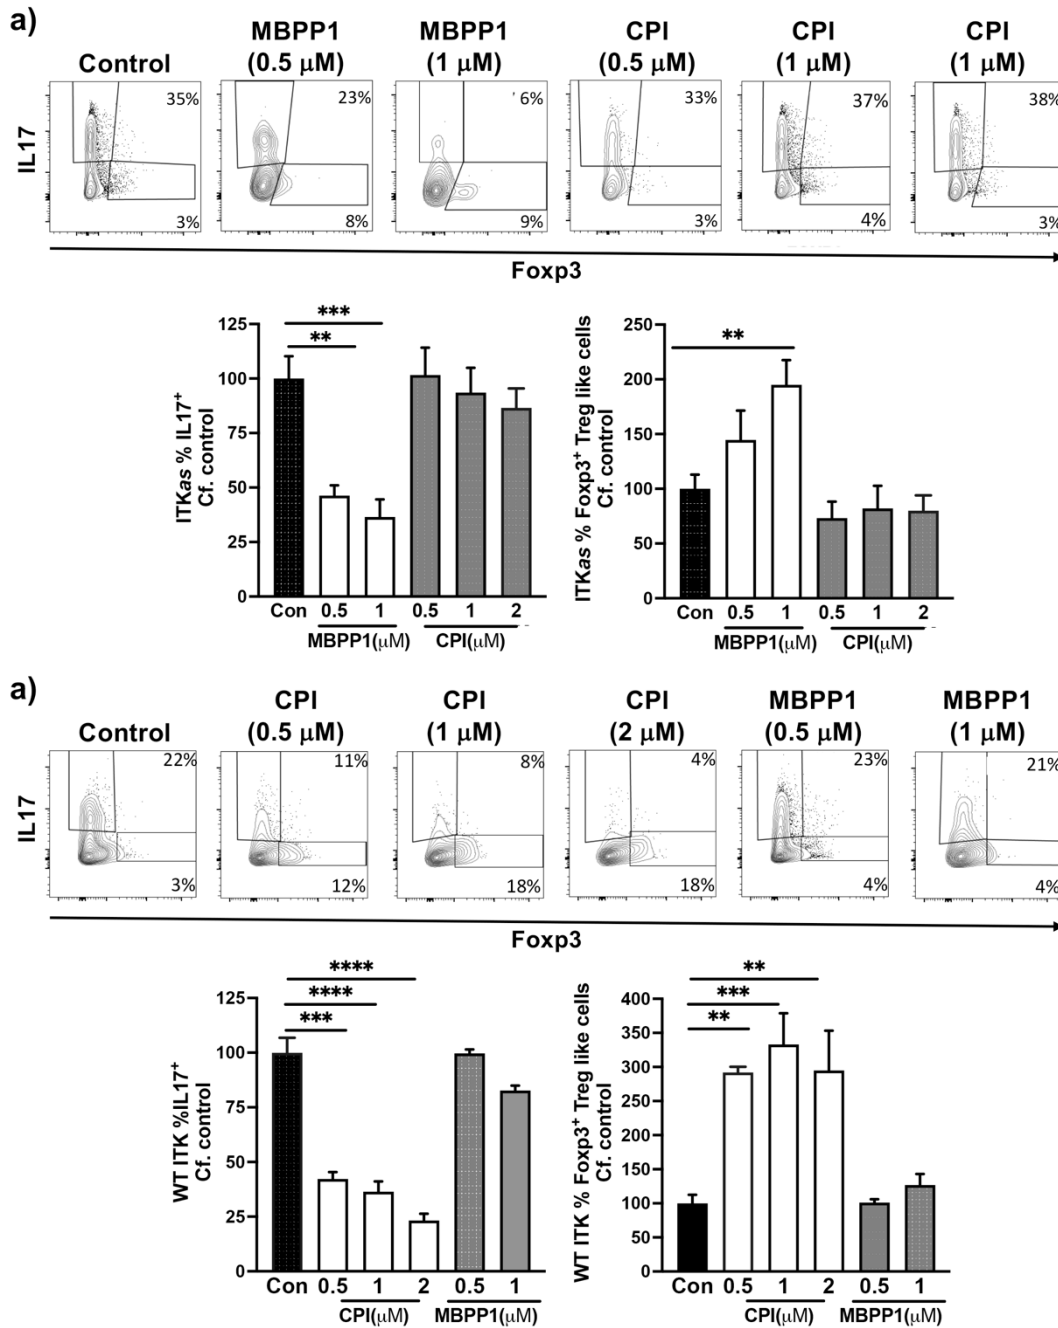

**Fig. S1. The effects of MBPP1 and CPI-818 on Th17 cells is specific.** (a) Naïve ITKas IL17A-GFP/Foxp3-RFP CD4<sup>+</sup> T cells were activated under Th17 differentiation conditions (anti-CD3/28, IL6 and TGFβ) in presence of ITKas inhibitor 2MBPP1, CPI-818, or DMSO control as indicated, followed by flow cytometric analysis for percentage of GFP<sup>+</sup>/IL17<sup>+</sup> cells and RFP<sup>+</sup>/Foxp3<sup>+</sup> Treg-like cells. (b) Naïve WT IL17A-GFP/Foxp3-RFP CD4<sup>+</sup> T cells were activated under Th17 differentiation conditions in presence of ITKas inhibitor 2MBPP1, CPI-818, or DMSO control as indicated, followed by flow cytometric analysis for percentage of GFP<sup>+</sup>/IL17<sup>+</sup> cells and

RFP<sup>+</sup>/Foxp3<sup>+</sup> Treg-like cells. Mean  $\pm$  SEM, Student's T test was performed for statistical significance where \*  $p \leq 0.05$ , \*\*  $p \leq 0.005$ , 3 independent experiments.
